# Supplementary material for: Meta-Analysis on Associations of RGS1 and IL12A Polymorphisms with Celiac Disease Risk
Source: PubMed Central journal article supplement (PMC4848913; doi:10.3390/ijms17040457), 2016-03-30
Supplement: ijms-17-00457-s001.pdf [file ijms-17-00457-s001.pdf]

## Supplementary Materials: Meta-Analysis on Associations of RGS1 and IL12A Polymorphisms with Celiac Disease Risk

Cong-Cong Guo, Man Wang, Feng-Di Cao, Wei-Huang Huang, Di Xiao, Xing-Guang Ye, Mei-Ling Ou, Na Zhang, Bao-Huan Zhang, Yang Liu, Guang Yang and Chun-Xia Jing

Table S1. The risk of bias assessment.

| First Author and Year         | Ascertainment of Celiac Disease | Ascertainment of Control | Quality Control for Genotyping | Population Stratification | Confounding Bias | Selective Outcome Report | HWE |
|-------------------------------|---------------------------------|--------------------------|--------------------------------|---------------------------|------------------|--------------------------|-----|
| Van Heel 2007 UK              | Yes                             | Yes                      | Yes                            | Yes                       | Yes              | Yes                      | Yes |
| Hunt 2008 UK                  | Yes                             | Yes                      | Yes                            | Yes                       | Yes              | Yes                      | Yes |
| Hunt 2008 Ireland             | Yes                             | Yes                      | Yes                            | Yes                       | Yes              | Yes                      | Yes |
| Hunt 2008 Netherlands         | Yes                             | Yes                      | Yes                            | Yes                       | Yes              | Yes                      | Yes |
| Romanos 2008 Italy            | Yes                             | Yes                      | Yes                            | Yes                       | Yes              | Yes                      | Yes |
| Coenen 2009 Netherlands       | Yes                             | Yes                      | Yes                            | Yes                       | Yes              | Yes                      | Yes |
| Dubois 2010 UK1(GWAS)         | Yes                             | Yes                      | Yes                            | Yes                       | Yes              | Yes                      | Yes |
| Dubois 2010 UK2(GWAS)         | Yes                             | Yes                      | Yes                            | Yes                       | Yes              | Yes                      | Yes |
| Dubois 2010 Finland(GWAS)     | Yes                             | Yes                      | Yes                            | Yes                       | Yes              | Yes                      | Yes |
| Dubois 2010 Netherlands(GWAS) | Yes                             | Yes                      | Yes                            | Yes                       | Yes              | Yes                      | Yes |
| Dubois 2010 Italy(GWAS)       | Yes                             | Yes                      | Yes                            | Yes                       | Yes              | Yes                      | Yes |
| Dubois 2010 USA               | Yes                             | Yes                      | Yes                            | Yes                       | Yes              | Yes                      | Yes |
| Dubois 2010 Hungary           | Yes                             | Yes                      | Yes                            | Yes                       | Yes              | Yes                      | Yes |
| Dubois 2010 Ireland           | Unclear                         | Unclear                  | Yes                            | Yes                       | Yes              | Yes                      | Yes |
| Dubois 2010 Poland            | Yes                             | Yes                      | Yes                            | Yes                       | Yes              | Yes                      | Yes |
| Dubois 2010 Spain             | Yes                             | Yes                      | Yes                            | Yes                       | Yes              | Yes                      | Yes |
| Dubois 2010 Italy             | Yes                             | Yes                      | Yes                            | Yes                       | Yes              | Yes                      | Yes |
| Dubois 2010 Finland           | Yes                             | Yes                      | Yes                            | Yes                       | Yes              | Yes                      | Yes |
| Sperandeo 2011 Italy          | Yes                             | Yes                      | Yes                            | Yes                       | Yes              | Yes                      | Yes |
| Plaza-Izurrieta 2011 Spain    | Yes                             | Yes                      | Yes                            | Yes                       | Yes              | Yes                      | Yes |

HWE: Hardy–Weinberg equilibrium; Yes: low risk of bias; No: high risk of bias; Unclear: unclear risk of bias; GWAS: genome-wide association study.

**Table S2.** Sensitive analysis for RGS1 rs2816316 (C vs. A).

| Excluded Study                | Pooled OR | 95% CI    | $p^a$  | $I^2$ (%) | $p$ -Value for $I^2$ |
|-------------------------------|-----------|-----------|--------|-----------|----------------------|
| Van Heel 2007 UK              | 0.77      | 0.74–0.80 | <0.001 | 9.5       | 0.340                |
| Hunt 2008 UK                  | 0.78      | 0.74–0.81 | <0.001 | 0.0       | 0.606                |
| Hunt 2008 Ireland             | 0.77      | 0.73–0.80 | <0.001 | 7.4       | 0.366                |
| Hunt 2008 Netherlands         | 0.77      | 0.74–0.81 | <0.001 | 6.0       | 0.382                |
| Romanos 2008 Italy            | 0.77      | 0.74–0.80 | <0.001 | 9.7       | 0.337                |
| Coenen 2009 Netherlands       | 0.77      | 0.74–0.81 | <0.001 | 2.6       | 0.425                |
| Dubois 2010 UK1(GWAS)         | 0.77      | 0.74–0.81 | <0.001 | 3.4       | 0.415                |
| Dubois 2010 UK2(GWAS)         | 0.76      | 0.73–0.80 | <0.001 | 3.5       | 0.414                |
| Dubois 2010 Finland(GWAS)     | 0.76      | 0.73–0.80 | <0.001 | 3.5       | 0.413                |
| Dubois 2010 Netherlands(GWAS) | 0.77      | 0.74–0.81 | <0.001 | 5.3       | 0.392                |
| Dubois 2010 Italy(GWAS)       | 0.77      | 0.74–0.80 | <0.001 | 9.0       | 0.346                |
| Dubois 2010 USA               | 0.77      | 0.74–0.80 | <0.001 | 9.4       | 0.340                |
| Dubois 2010 Hungary           | 0.76      | 0.73–0.80 | <0.001 | 1.1       | 0.442                |
| Dubois 2010 Ireland           | 0.77      | 0.73–0.80 | <0.001 | 6.4       | 0.378                |
| Dubois 2010 Poland            | 0.76      | 0.73–0.80 | <0.001 | 0.0       | 0.586                |
| Dubois 2010 Spain             | 0.77      | 0.74–0.80 | <0.001 | 10.0      | 0.333                |
| Dubois 2010 Italy             | 0.77      | 0.73–0.80 | <0.001 | 5.8       | 0.386                |
| Dubois 2010 Finland           | 0.77      | 0.74–0.80 | <0.001 | 9.6       | 0.337                |
| Sperandeo 2011 Italy          | 0.77      | 0.74–0.80 | <0.001 | 10.1      | 0.331                |
| Plaza-Izurieteta 2011 Spain   | 0.77      | 0.74–0.80 | <0.001 | 8.1       | 0.357                |

<sup>a</sup>  $p$ : value for Z test; GWAS: genome-wide association study.

**Table S3.** Sensitive analysis for IL12A rs17810546 (G vs. A).

| Excluded Study                | Pooled OR | 95% CI    | $p^a$  | $I^2$ (%) | $p$ -Value for $I^2$ |
|-------------------------------|-----------|-----------|--------|-----------|----------------------|
| Van Heel 2007 UK              | 1.37      | 1.31–1.43 | <0.001 | 17.3      | 0.242                |
| Hunt 2008 UK                  | 1.38      | 1.32–1.44 | <0.001 | 4.4       | 0.403                |
| Hunt 2008 Ireland             | 1.36      | 1.30–1.42 | <0.001 | 14.0      | 0.283                |
| Hunt 2008 Netherlands         | 1.36      | 1.30–1.43 | <0.001 | 16.1      | 0.258                |
| Romanos 2008 Italy            | 1.36      | 1.30–1.42 | <0.001 | 9.3       | 0.342                |
| Coenen 2009 Netherlands       | 1.36      | 1.30–1.42 | <0.001 | 12.0      | 0.308                |
| Dubois 2010 UK1(GWAS)         | 1.36      | 1.30–1.42 | <0.001 | 14.0      | 0.282                |
| Dubois 2010 UK2(GWAS)         | 1.39      | 1.32–1.45 | <0.001 | 9.0       | 0.345                |
| Dubois 2010 Finland(GWAS)     | 1.37      | 1.31–1.43 | <0.001 | 17.2      | 0.243                |
| Dubois 2010 Netherlands(GWAS) | 1.36      | 1.30–1.42 | <0.001 | 12.7      | 0.299                |
| Dubois 2010 Italy(GWAS)       | 1.36      | 1.30–1.42 | <0.001 | 5.5       | 0.389                |
| Dubois 2010 USA               | 1.37      | 1.31–1.44 | <0.001 | 12.2      | 0.305                |
| Dubois 2010 Hungary           | 1.36      | 1.30–1.42 | <0.001 | 10.2      | 0.330                |
| Dubois 2010 Ireland           | 1.36      | 1.30–1.42 | <0.001 | 15.2      | 0.268                |
| Dubois 2010 Poland            | 1.37      | 1.31–1.43 | <0.001 | 16.9      | 0.248                |
| Dubois 2010 Spain             | 1.37      | 1.31–1.44 | <0.001 | 11.2      | 0.317                |
| Dubois 2010 Italy             | 1.37      | 1.31–1.43 | <0.001 | 14.8      | 0.273                |
| Dubois 2010 Finland           | 1.37      | 1.31–1.44 | <0.001 | 8.9       | 0.346                |
| Sperandeo 2011 Italy          | 1.37      | 1.31–1.43 | <0.001 | 13.7      | 0.287                |
| Plaza-Izurieteta 2011 Spain   | 1.37      | 1.31–1.43 | <0.001 | 16.9      | 0.248                |

<sup>a</sup>  $p$ : value for Z test; GWAS: genome-wide association study.
